# Supplementary material for: COVID-19 Pandemic and Infant Neurodevelopmental Impairment: A Systematic Review and Meta-analysis
Source: PubMed Central journal article supplement (PMC9617178; doi:10.1001/jamanetworkopen.2022.38941), 2022-10-28

## Supplemental Online Content

Hessami K, Norooznejhad AH, Monteiro S, et al. COVID-19 pandemic and infant neurodevelopmental impairment: a systematic review and meta-analysis. *JAMA Netw Open*. 2022;5(10):e2238941. doi:10.1001/jamanetworkopen.2022.38941

**eTable 1.** Search Strategy

**eTable 2.** Subgroup Analysis of Neurodevelopmental Impairment According to the Age at Which Screening Has Been Performed

**eFigure 1.** Meta-analysis Results on Risk of (a) Problem-solving and (b) Communication Among Infants Screened During Pandemic vs Before Pandemic

**eFigure 2.** Meta-analysis Results on Risk of (a) Problem-solving and (b) Communication Among In Utero Exposed vs Unexposed Pandemic-Born Cohorts

This supplemental material has been provided by the authors to give readers additional information about their work.

**e Table 1.** Search Strategy

We searched PubMed, Web of Science, Embase for studies published in any language up to and including 25 March 2022 that reported the impact of COVID-19 pandemic on infantile neurodevelopment. We searched using keywords related to COVID-19 pandemic and neurodevelopment. Full search strategies for each database are provided below in a table.

| Pubmed         |                  |                                                                                                                                                                                                                                                                                                                                             |
|----------------|------------------|---------------------------------------------------------------------------------------------------------------------------------------------------------------------------------------------------------------------------------------------------------------------------------------------------------------------------------------------|
| Number         | Theme            | Search query                                                                                                                                                                                                                                                                                                                                |
| 1              | COVID-19         | ("COVID-19" OR "Coronavirus" OR "Severe Acute Respiratory Syndrome" OR "Corona-virus" OR "2019nCoV" OR "Corona Virus" OR "COVID" OR "COVID19" OR "SARS CoV 2" OR "SARS-CoV" OR "SARS-CoV-2")                                                                                                                                                |
| 2              | Neurodevelopment | ("neurodevelopment" OR "neurodevelopmental" OR "development disorder*" OR "developmental disorder*" OR "Intellectual Disability" OR "Intellectual Developmental Disorder*" OR "mental retardation" OR "Global Developmental Delay" OR "Communication Disorders" OR "gross motor" OR "fine motor" OR "personal social" OR "problem solving") |
| 3              | Search           | #1 AND #2                                                                                                                                                                                                                                                                                                                                   |
| Web of science |                  |                                                                                                                                                                                                                                                                                                                                             |
| 1              | COVID-19         | ("COVID-19" OR "Coronavirus" OR "Severe Acute Respiratory Syndrome" OR "SARS-CoV-2")                                                                                                                                                                                                                                                        |
| 2              | Neurodevelopment | ("neurodevelopment" OR "neurodevelopmental" OR "development disorder*" OR "developmental disorder*" OR "Intellectual Disability" OR "Intellectual Developmental Disorder*" OR "mental retardation" OR "Global Developmental Delay")                                                                                                         |
| 3              | Search           | #1 AND #2                                                                                                                                                                                                                                                                                                                                   |
| Embase         |                  |                                                                                                                                                                                                                                                                                                                                             |
| 1              | COVID-19         | ("COVID-19" OR "Coronavirus" OR "Severe Acute Respiratory Syndrome" OR "SARS-CoV-2")                                                                                                                                                                                                                                                        |
| 2              | Neurodevelopment | ("neurodevelopment" OR "neurodevelopmental" OR "development disorder*" OR "developmental disorder*" OR "Intellectual Disability" OR "Intellectual Developmental Disorder*" OR "mental retardation" OR "Global Developmental Delay")                                                                                                         |
| 3              | Search           | #1 AND #2                                                                                                                                                                                                                                                                                                                                   |

**e Table 2.** Subgroup Analysis of Neurodevelopmental Impairment According to the Age at Which Screening Has Been Performed

| ASQ-3 domains   | Age at screening | Number of studies | OR (95% CI), p-value       | I <sup>2</sup> , p-value |
|-----------------|------------------|-------------------|----------------------------|--------------------------|
| Gross motor     | 6 months         | 3                 | 1.63 (0.73, 3.61), p=0.23  | 12%, p=0.32              |
|                 | 12 months        | 3                 | 0.97 (0.71, 1.33), p=0.85  | 42%, p=0.18              |
| Fine motor      | 6 months         | 3                 | 0.96 (0.69, 1.33), p=0.79  | 0.0%, p=0.65             |
|                 | 12 months        | 3                 | 1.83 (0.66, 5.08), p=0.25  | 80%, p=0.006             |
| Problem solving | 6 months         | 3                 | 0.98 (0.63, 1.53), p=0.92  | 0.0%, p=0.53             |
|                 | 12 months        | 3                 | 1.03 (0.66, 1.59), p=0.91  | 40%, p=0.19              |
| Personal social | 6 months         | 3                 | 0.85 (0.64, 1.14), p=0.27  | 0.0%, p=0.46             |
|                 | 12 months        | 3                 | 1.55 (1.22, 1.96), p<0.001 | 0.0%, p=0.62             |
| Communication   | 6 months         | 3                 | 1.69 (0.83, 3.44), p=0.15  | 0.0%, p=0.60             |
|                 | 12 months        | 3                 | 1.86 (1.15, 3.00), p=0.01  | 70%, p=0.07              |

**e-Figure 1.** Meta-Analysis Results on Risk of (a) Problem-Solving and (b) Communication Among Infants Screened During Pandemic vs Before Pandemic

(a)

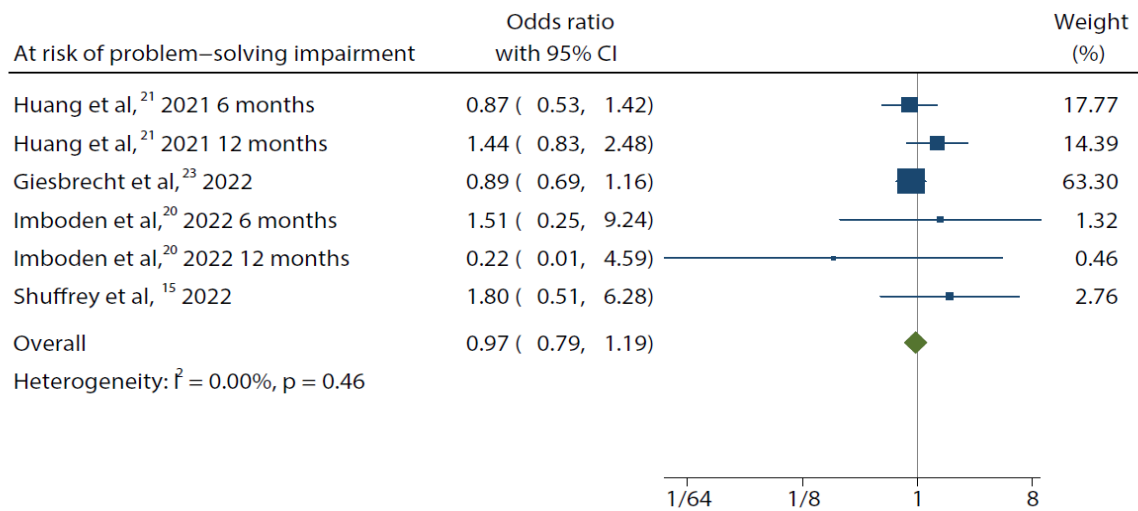

Random-effects DerSimonian Laird model

(b)

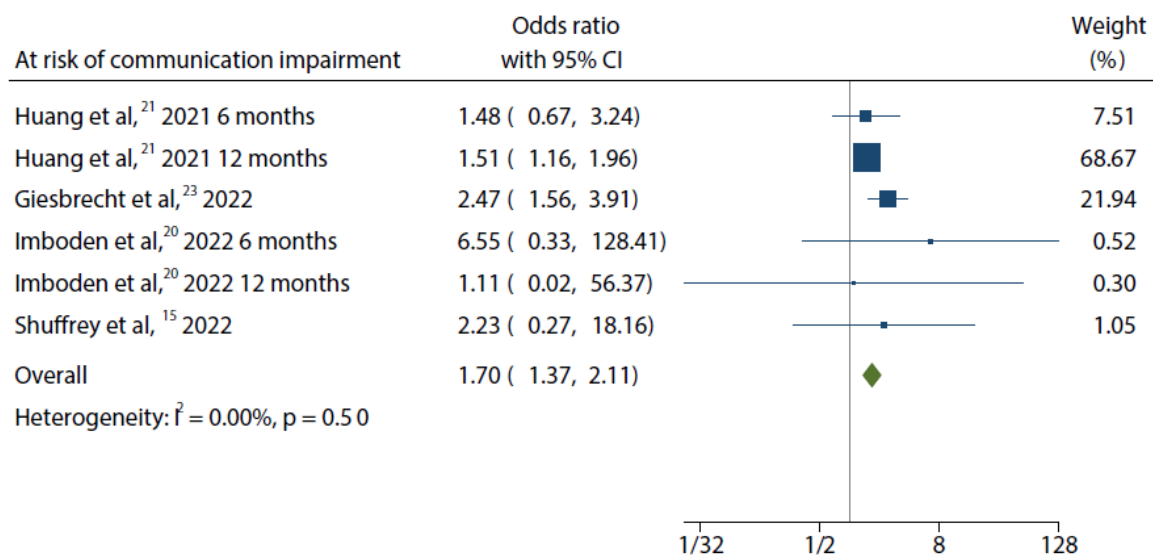

Random-effects DerSimonian Laird model

**e-Figure 2.** Meta-Analysis Results on Risk of (a) Problem-Solving and (b) Communication Among In Utero Exposed vs Unexposed Pandemic-Born Cohorts

(a)

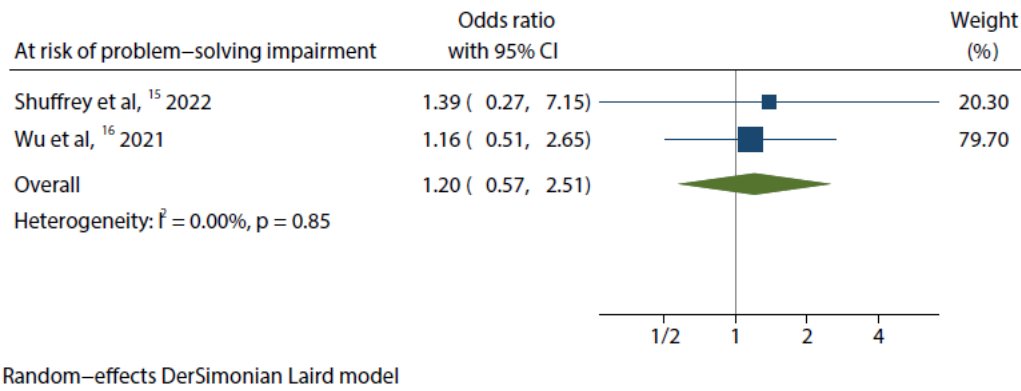

(b)

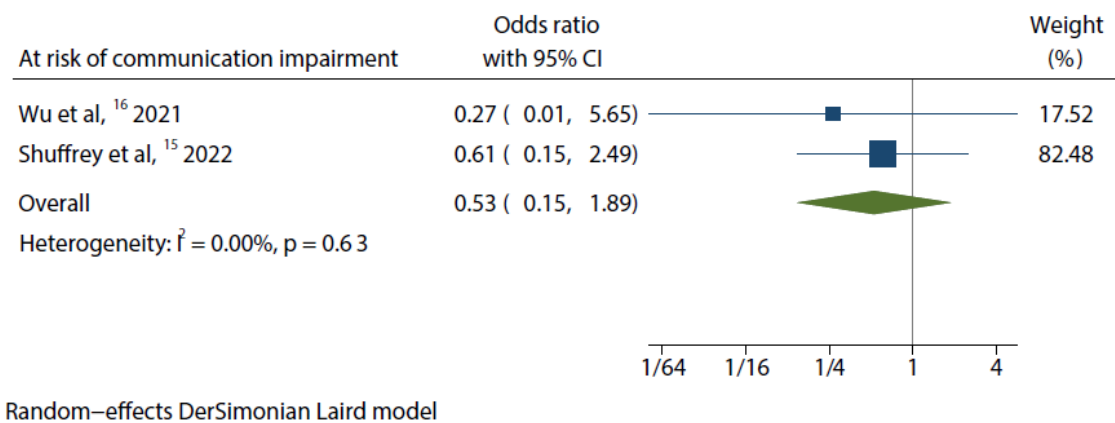

Supplement: jamanetwopen-e2238941-s001.pdf [file jamanetwopen-e2238941-s001.pdf]
